# Supplementary material for: Facile Tailoring of Contact Layer Characteristics of the Triboelectric Nanogenerator Based on Portable Imprinting Device
Source: MDPI journal article supplement (doi:10.3390/ma13040872), 2020-02-15
Supplement: s1 [file s1]

# Facile Tailoring of Contact Layer Characteristics of the Triboelectric Nanogenerator Based on Portable Imprinting Device

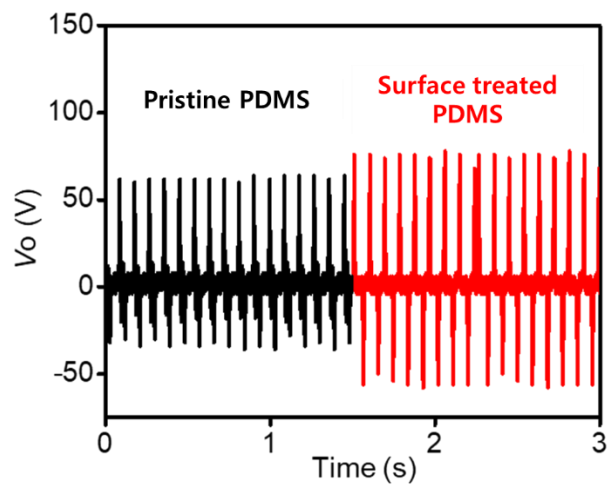

**Figure S1.** Output voltages generated from the TENG with the pristine PDMS contact layer and the ozone treated PDMS contact layer.
